# Supplementary material
Source: Springer Nature journal article supplement (https://www.springermedizin.de/resource/supplementary/13054_2013_2526_MOESM1_ESM.pdf/9714230)
Supplement: MOESM1 [file 9714230]

**Table S1** Characteristics of the included patients

| <b>Trial</b>                 | <b>Age (yr) ( P, S)</b>  | <b>Female (%) ( P, S)</b> | <b>ICU LOS<sup>#</sup> (days) ( P, S)</b> | <b>Days of MV ( P, S)</b> | <b>Direct pulmonary injury (%) ( P, S)</b> | <b>Pplat cm H<sub>2</sub>O</b> | <b>Paralytics</b> | <b>HFO</b> | <b>No. of days<sup>□</sup></b> | <b>No. of organ dysfunctions ( P, S)</b> |
|------------------------------|--------------------------|---------------------------|-------------------------------------------|---------------------------|--------------------------------------------|--------------------------------|-------------------|------------|--------------------------------|------------------------------------------|
| <b>Gattinoni 2001(9)</b>     | 59 ± 17, 57 ± 16         | 34.2, 25                  | NA*                                       | NA                        | >80.4, >71.4                               | NA                             | YES               | NO         | 10                             | 1.4 ± 1.0*, 1.3 ± 1.0                    |
| <b>Guerin 2004(10)</b>       | 62.0 ± 15.7, 62.5 ± 14.7 | 26.4, 23.5                | 26.6 ± 29.6, 24.5 ± 21.9                  | 13.7 ± 7.8, 14.1 ± 8.6    | >61.7, >60.3                               | NA                             | YES               | NO         | 4                              | 2.2 ± 1.0*, 2.3 ± 1.0                    |
| <b>Voggenreiter 2005(18)</b> | 40 ± 14, 43 ± 10         | 14, 21                    | NA                                        | 30 ± 17, 33 ± 23          | NA                                         | NA                             | YES               | NO         | 10                             | NA                                       |
| <b>Curley 2005(17)</b>       | 2.0, 2.1                 | 53, 41                    | NA                                        | NA                        | 82, 86                                     | NA                             | NA                | YES        | 7                              | 2, 2                                     |
| <b>Mancebo 2006(22)</b>      | 54 ± 17, 54 ± 16         | 30, 42                    | 20.5 ± 18.2, 19.1 ± 23.1                  | NA                        | >70, >52                                   | 32                             | YES               | NO         | 10                             | 1.1 ± 1.2, 1.1 ± 1.2                     |
| <b>Chan 2007(19)</b>         | 54.7 ± 21.8, 69.9 ± 15.5 | 18.2, 18.2                | NA                                        | NA                        | NA                                         | NA                             | NA                | NO         | ≥ 3                            | NA                                       |
| <b>Fernandez 2008(20)</b>    | 53.9 ± 17.9, 55.3 ± 14.6 | 43, 31                    | 14.7 ± 9.7, 17.5 ± 16.1                   | 11.9 ± 9, 15.7 ± 16.9     | >62, >68                                   | 29.2                           | NA                | NO         | NA                             | NA                                       |
| <b>Taccone 2009(25)</b>      | 60 ± 16                  | 28.7                      | 17.5, 16                                  | 16, 14                    | >65.5, >65.5                               | ≥ 20                           | YES               | NO         | 28                             | NA                                       |
| <b>Gu érin 2013(14)</b>      | 58 ± 16, 60 ± 16         | 30, 33.6                  | 22.5, 22                                  | NA                        | >62.4                                      | 23.5                           | YES               | NO         | 28                             | NA                                       |

※Data were not supplied in the primary article; P, prone; S, supine; ICU, intensive care unit; n, number of deaths; N, number in group; #ICU long of stay; □

Number of days that prone-position occurred; MV, mechanical ventilation; Pplat, plateau pressure
